# Supplementary material for: Bioinspired oral delivery of gut microbiota by self-coating with biofilms
Source: PubMed Central journal article supplement — Sci Adv. 2020 Jun 24;6(26):eabb1952. doi: 10.1126/sciadv.abb1952 (PMC7314526; doi:10.1126/sciadv.abb1952), 2020-06-24
Supplement: abb1952_SM.pdf [file abb1952_SM.pdf]

## Supplementary Materials for

### **Bioinspired oral delivery of gut microbiota by self-coating with biofilms**

Xinyue Wang, Zhenping Cao, Mengmeng Zhang, Lu Meng, Zunzhen Ming, Jinyao Liu\*

\*Corresponding author. Email: [jyliu@sjtu.edu.cn](mailto:jyliu@sjtu.edu.cn)

Published 24 June 2020, *Sci. Adv.* **6**, eabb1952 (2020)  
DOI: [10.1126/sciadv.abb1952](https://doi.org/10.1126/sciadv.abb1952)

**This PDF file includes:**

Figs. S1 to S10

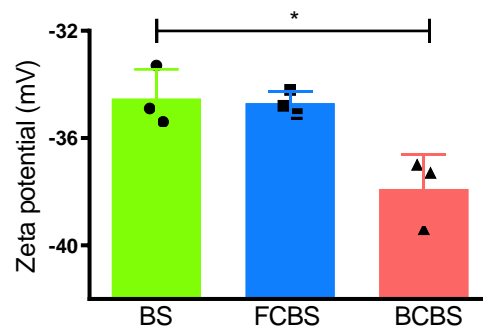

**Figure S1 Zeta potential characterization.** Zeta potential was analyzed by dynamic light scattering (Malvern Zetasizer nano ZS, UK). Error bars represent standard deviation ( $n = 3$ ). Significance was assessed using Student's t-test, giving p values,  $p < 0.05$ , \*.

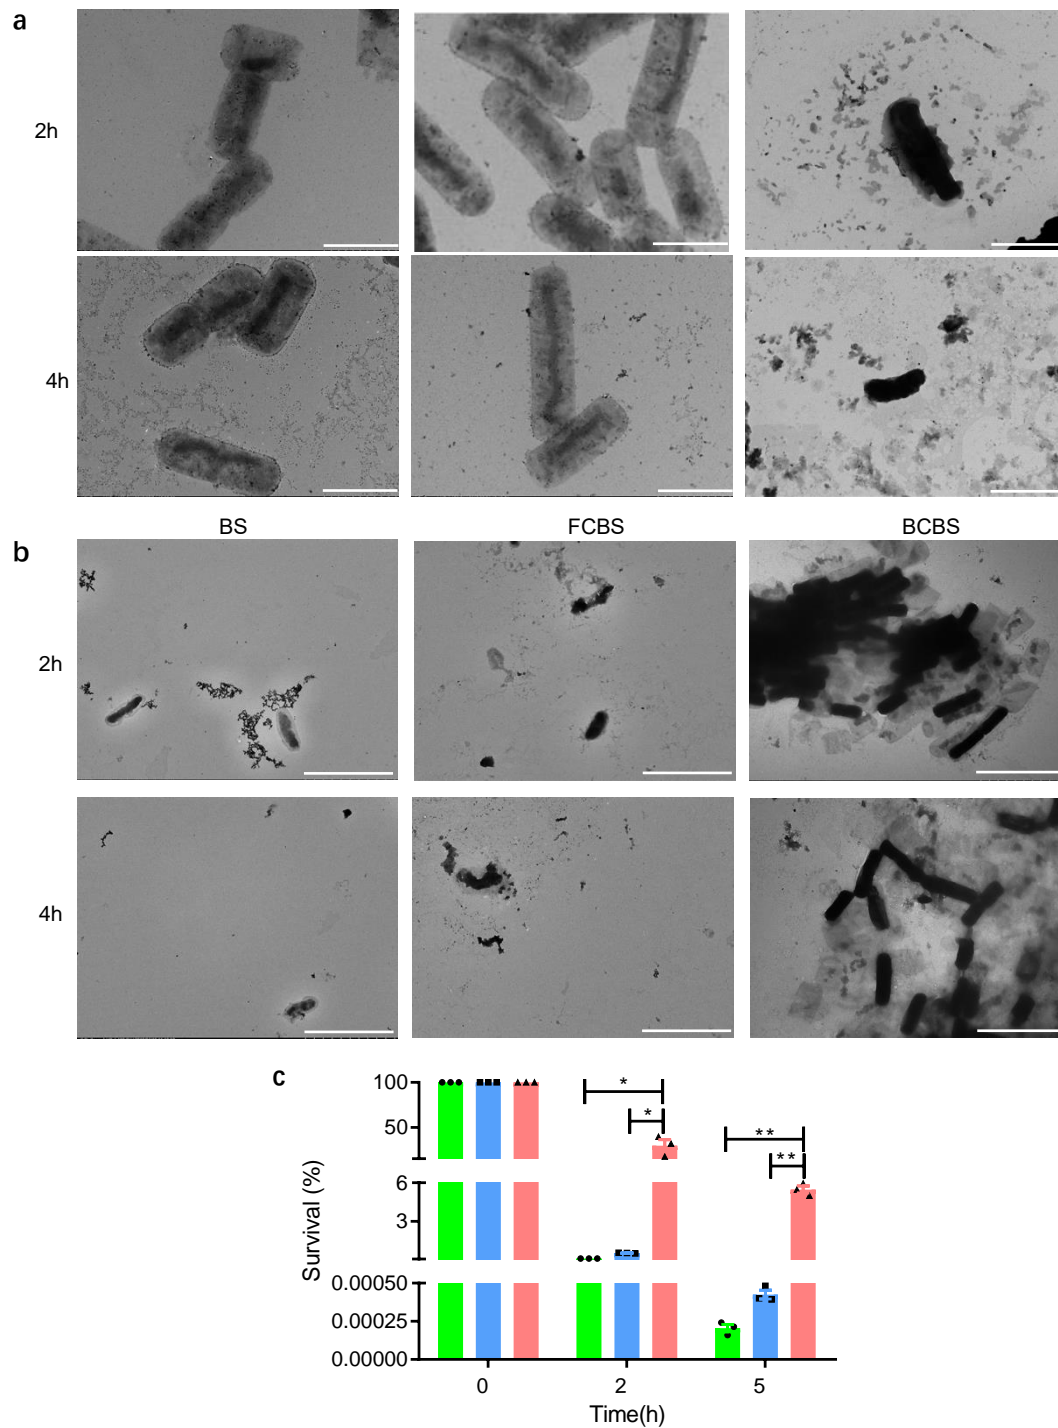

**Figure S2 Resistance of the bacteria against environmental assaults.** **a, b** TEM images of BS, FCBS and BCBS after culture in **(a)** SGF (pH 1.2) and **(b)** bile salts (0.3 mg/ml) at 37 °C for the indicated time points. Scale bar: **(a)** 2  $\mu$ m, **(b)** 5  $\mu$ m. **c** Equal amounts of BS (circle), FCBS (square) and BCBS (triangle) were separately exposed to ampicillin (10 mg/ml). After incubation at 37 °C for the indicated time points, 50  $\mu$ l of each sample was washed twice with PBS, spread onto LB agar plates and incubated at 37 °C for 24 hours before bacterial counting. Error bars represent standard deviation ( $n = 3$ ). Significance was assessed using Student's t-test, giving p values,  $p < 0.05$ , \*;  $p < 0.01$ , \*\*;  $p < 0.001$ .

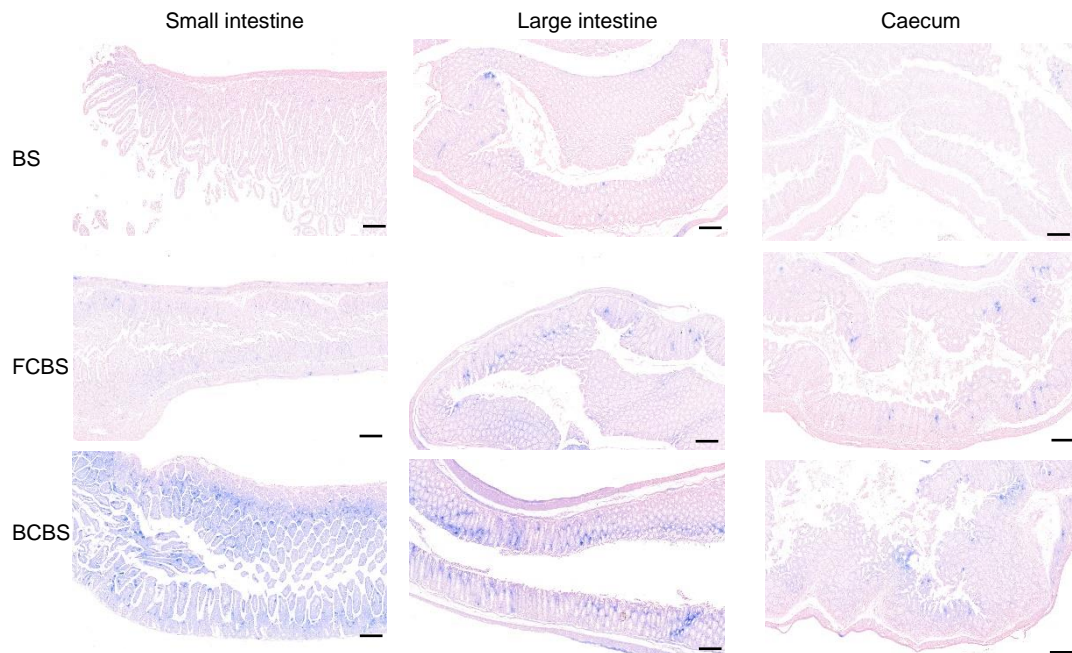

**Figure S3 Mucoadhesion of BCBS in mouse intestines.** Representative microscopic images of Gram staining of the intestines harvested from mice orally delivered with  $1 \times 10^7$  CFUs of bacteria at 24 hours post-administration. Scale bar: 200  $\mu\text{m}$ .

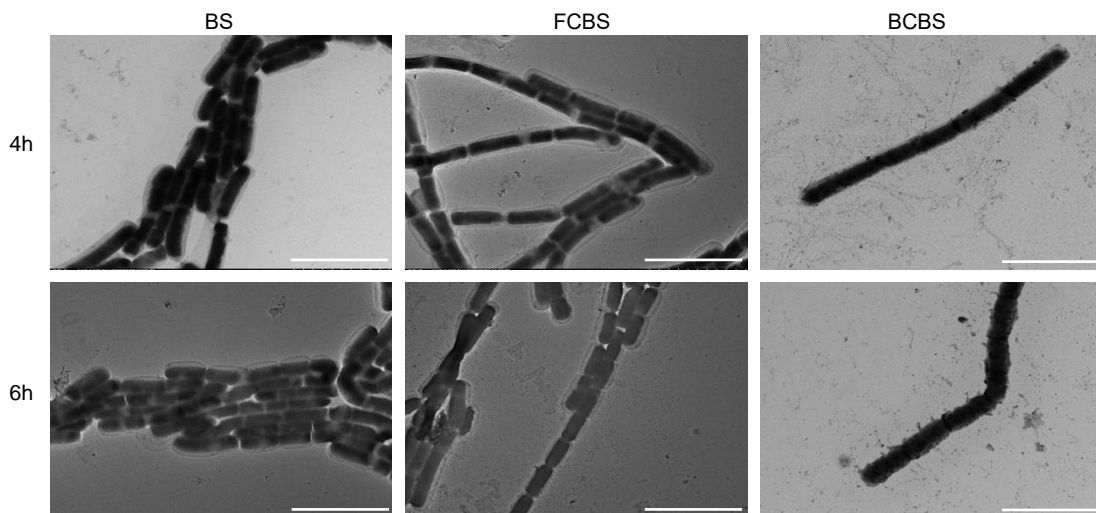

**Figure S4 Bacterial viability.** TEM images of BS, FCBS and BCBS after culture with SIF at 37  $^{\circ}\text{C}$  for the indicated time points. Scale bar: 5  $\mu\text{m}$ .

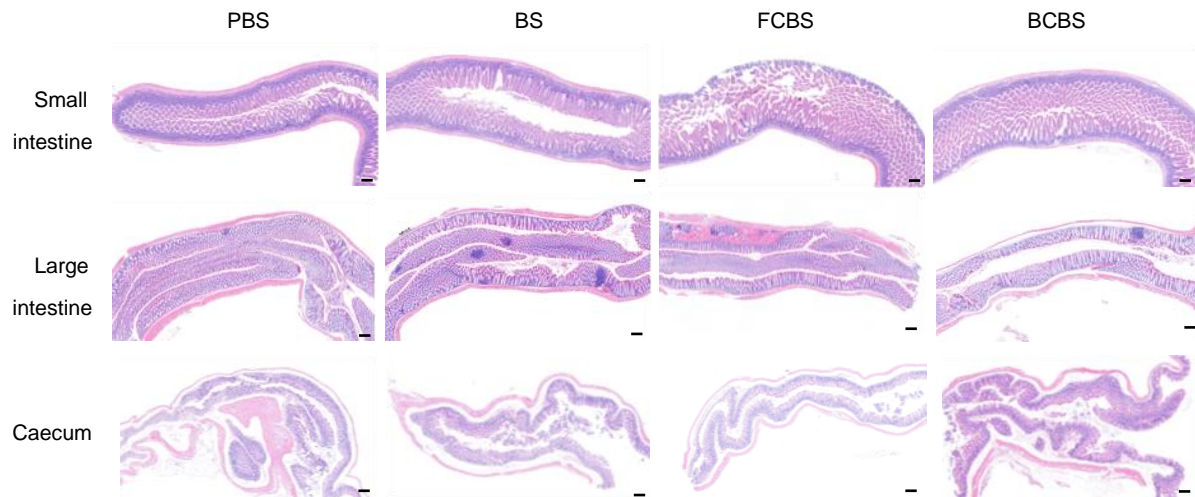

**Figure S5 Biosafety in mice.** Representative H&E staining images of mouse intestines harvested from mice orally administrated with  $1 \times 10^7$  CFUs of bacteria at 120 hours post-administration. Scale bar: 200 μm.

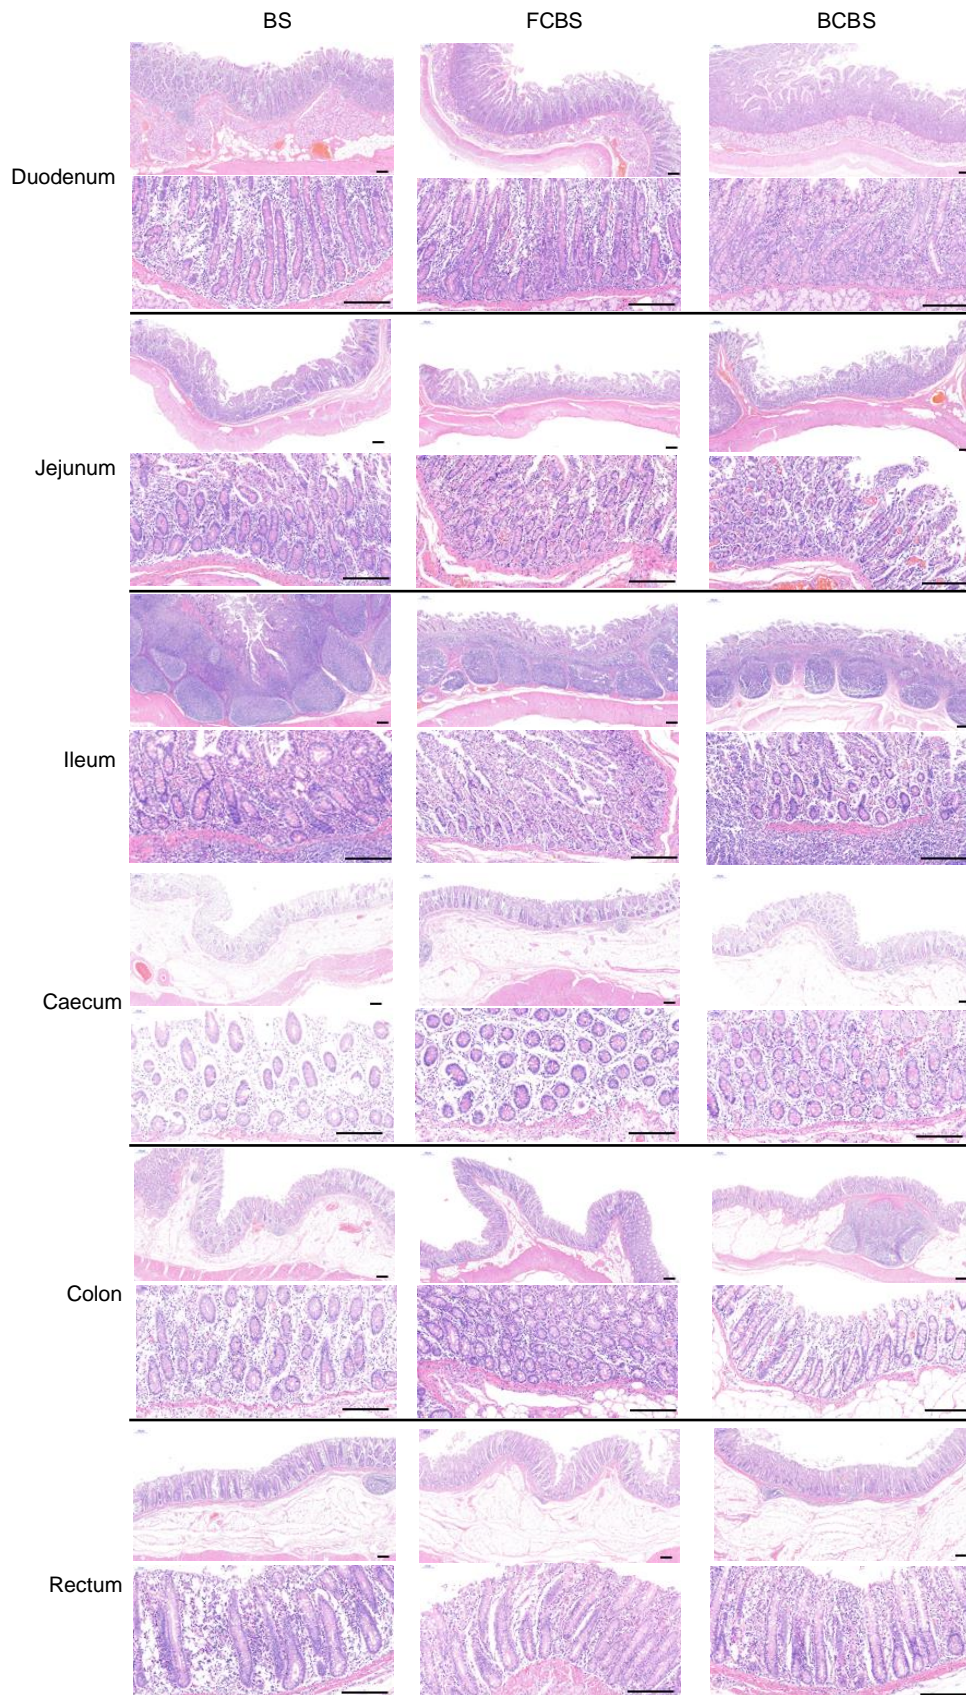

**Figure S6 Biosafety in swine.** Representative H&E staining images of intestines harvested from swine orally administrated with  $3.5 \times 10^8$  CFUs of bacteria at day 8 post-administration. Scale bar: 200  $\mu$ m.

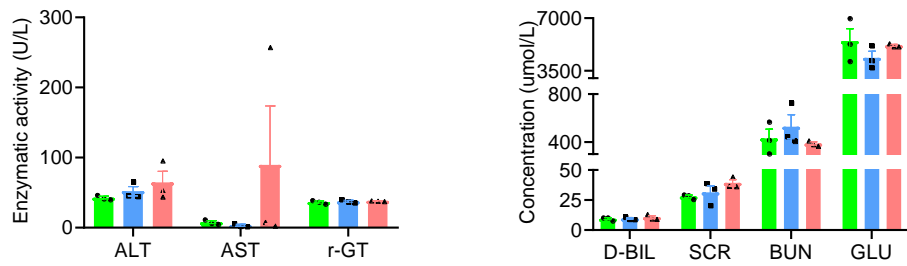

**Figure S7 Cytokine assays.** Liver function tests including ALT, AST and r-GT. Kidney function tests containing D-BIL, SCR, BUN and GLU. The blood samples were withdrawn from swine orally administrated with  $3.5 \times 10^8$  CFUs of bacteria at day 8 post-administration. Circle, square and triangle represent BS, FCBS and BCBS, respectively.

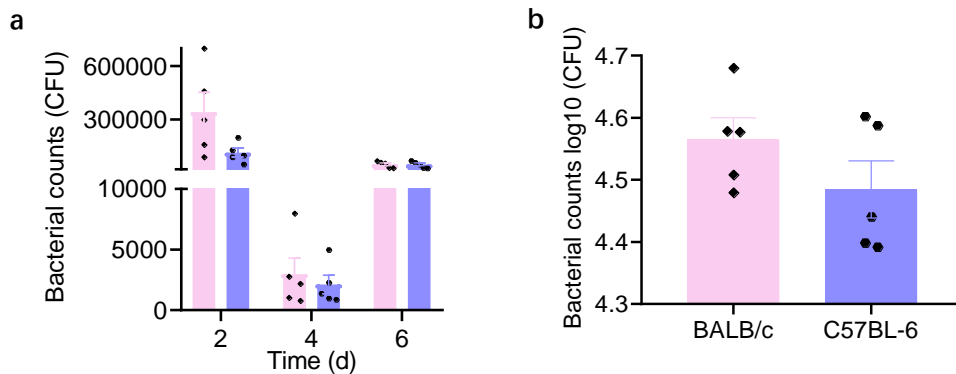

**Figure S8 Intestinal colonization of *S. aureus* in mice.** **a** Quantities of the colonized *S. aureus* in feces separately collected from BALB/c (tetragon) and C57BL-6 (hexagon) at the indicated time points. **b** Colonization of *S. aureus* in mouse intestines harvested at day 7 post-administration of  $1 \times 10^9$  CFUs of *S. aureus*.

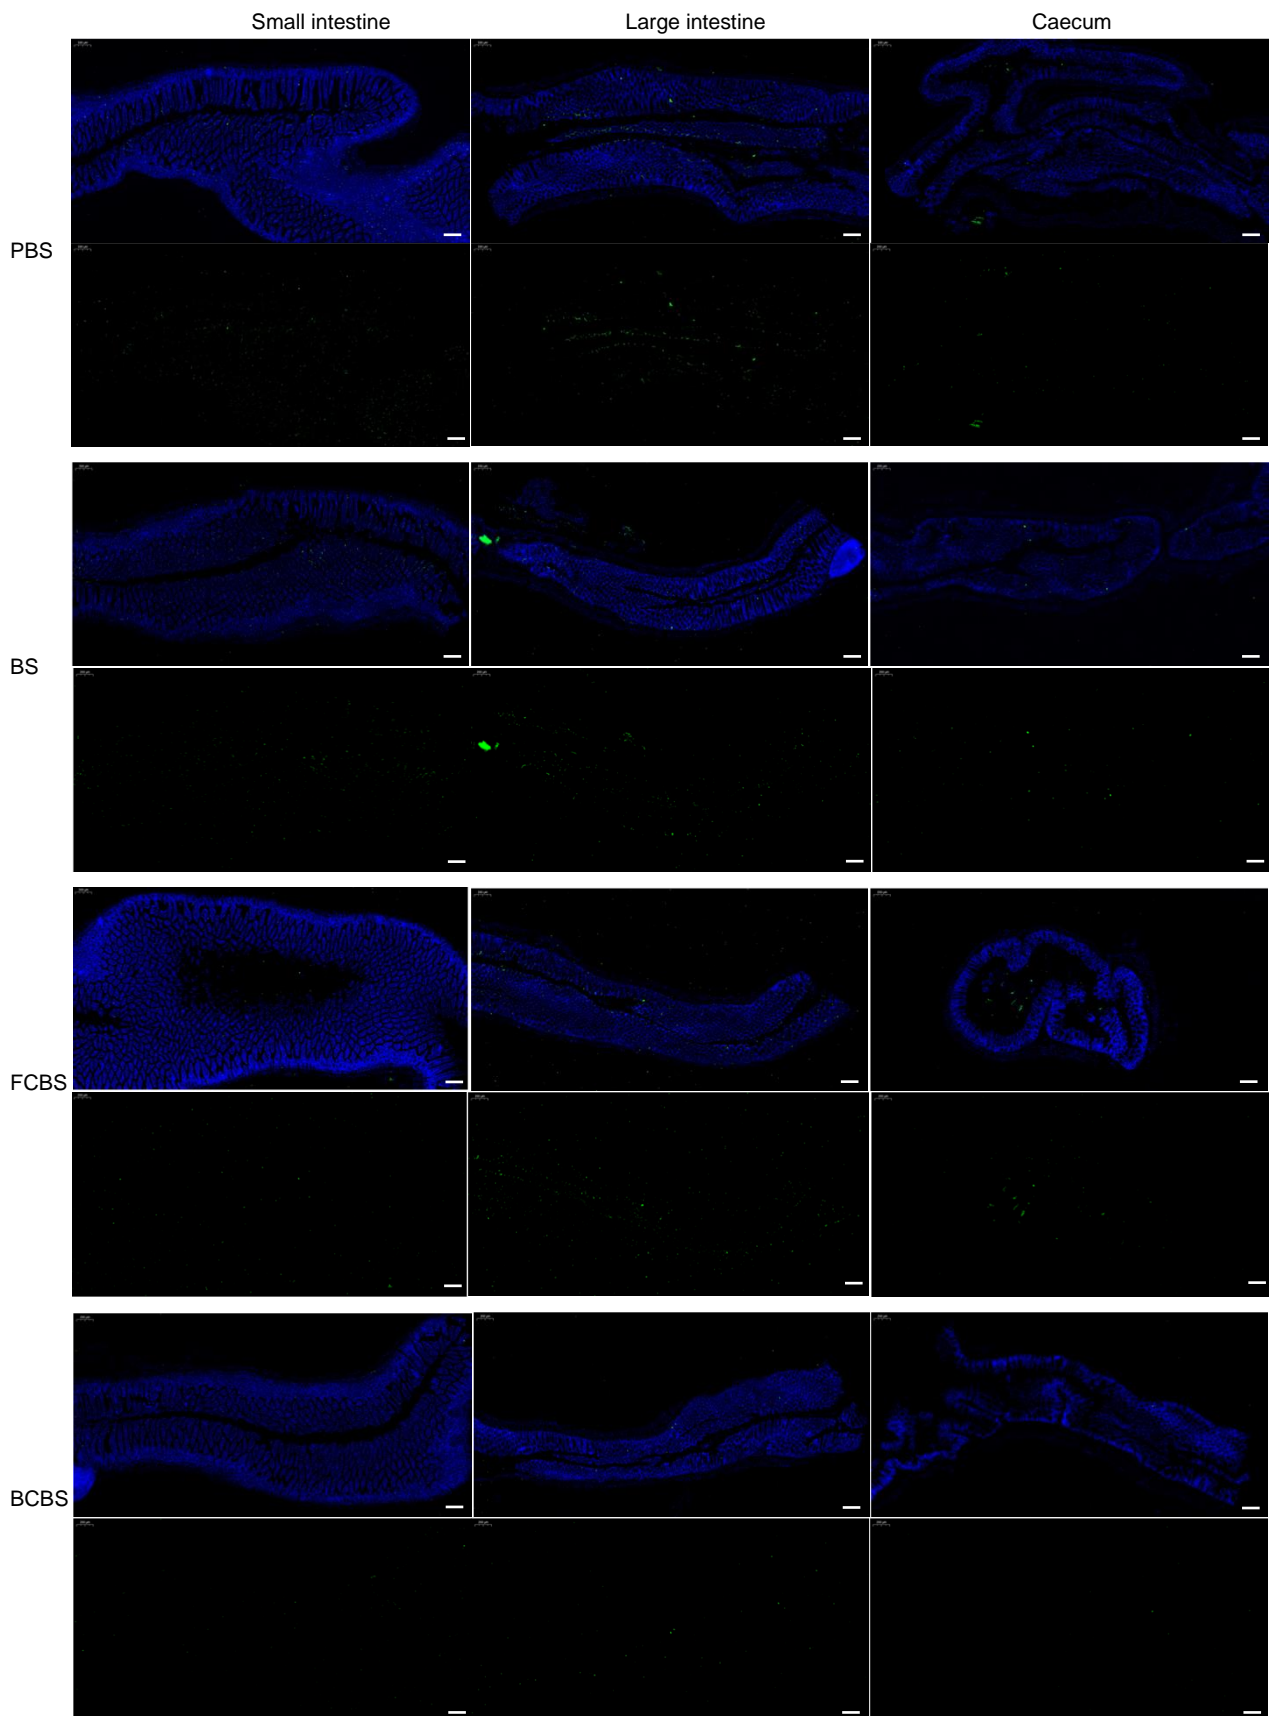

**Figure S9 Treatment of intestinal colonization of *S. aureus*.** Typical microscopic images of *S. aureus* colonized in the bowel wall 7 days post-treatment. Green fluorescence represents *S. aureus* colonized in the intestines. Scale bar: 200  $\mu\text{m}$ .



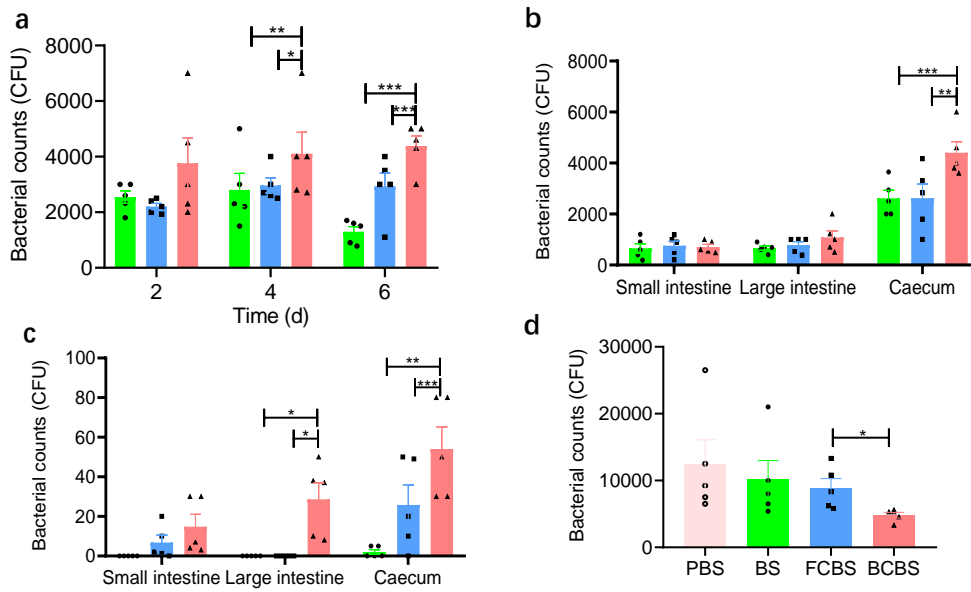

**Figure S10 Reservation of BCBS in mice colonized with *S. aureus*.** **a-c** Numbers of the colonized probiotics in **(a)** feces collected at the indicated time points as well as intestinal **(b)** contents and **(c)** tissues sampled 7 days post-treatment. Circle, square and triangle represent BS, FCBS and BCBS, respectively. **d** Amounts of *S. aureus* invaded in blood sampled from the mice 7 days post-treatment. Error bars represent standard deviation ( $n = 5$ ). Significance was assessed using Student's t-test, giving p values,  $p < 0.05$ , \*;  $p < 0.01$ , \*\*;  $p < 0.001$ , \*\*\*.
